# Supplementary material for: Multi-Fold Computational Analysis to Discover Novel Putative Inhibitors of Isethionate Sulfite-Lyase (Isla) from Bilophila wadsworthia: Combating Colorectal Cancer and Inflammatory Bowel Diseases
Source: MDPI journal article supplement (doi:10.3390/cancers15030901), 2023-01-31
Supplement: s1 [file s1]

# Supporting Information

## Multi-fold Computational Analysis to Discover Novel Putative Inhibitors of isethionate sulfite-lyase (Isla) from *Bilophila wadsworthia*: Combating colorectal cancer and inflammatory bowel diseases

Muhammad Waqas<sup>1,2†</sup>, Sobia Ahsan Halim<sup>1†</sup>, Atta Ullah<sup>1,3</sup>, Assim Alaa Mohammed Ali<sup>1</sup>, Asaad Khalid<sup>4,5</sup>, Ashraf N. Abdalla<sup>6</sup>, Ajmal Khan<sup>1\*</sup>, Ahmed Al-Harrasi<sup>1,\*</sup>

1 Natural and Medical Sciences Research Center, University of Nizwa, P.O Box 33, Postal Code 616, Birkat Al Mauz, Nizwa, Sultanate of Oman

2 Department of Biotechnology and genetic Engineering, Hazara University Mansehra, Mansehra 2100, Pakistan

3 Department of Zoology, Abdul Wali Khan University, Mardan 23200, Pakistan

4 Substance Abuse and Toxicology Research Center, Jazan University, P.O. Box: 114, Jazan 45142, Saudi Arabia

5 Medicinal and Aromatic Plants and Traditional Medicine Research Institute, National Center for Research, P. O. Box 2404, Khartoum, Sudan

6 Department of Pharmacology and Toxicology, College of Pharmacy, Umm Al-Qura University, Makkah 21955, Saudi Arabia

\* \*Correspondence: ajmalkhan@unizwa.edu.om (A.K); aharrasi@unizwa.edu.om (A.A-H)

† These Authors contributes equally

### Table of Contents

|            |                                                                                                                                                                                                                 |
|------------|-----------------------------------------------------------------------------------------------------------------------------------------------------------------------------------------------------------------|
| Table S1   | Physiochemical properties of selected inhibitors from SwissADME server.                                                                                                                                         |
| Table S2   | Pharmacokinetics properties of selected inhibitors from SwissADME server                                                                                                                                        |
| Table S3   | Drug likeness and Medicinal chemistry properties of selected inhibitors from the SwissADME server.                                                                                                              |
| Table S4   | Detailed hydrogen bond interactions of Isla protein with the selected inhibitors and reference agonist attached (7KQ3) complexes versus simulation time.                                                        |
| Figure S1  | Root mean square histogram analysis of Isla in free state (7KQ4), reference substrate attached (7KQ3) and in complex with selected putative inhibitors.                                                         |
| Figure S2. | The covariance matrix plotted against the corresponding eigenvector from each system to obtain the first ten eigenvectors in fraction. The eigenvectors contribution for each system is reported in percentage. |

**Table S1.** Physiochemical properties of compounds **1-9** calculated by SwissADME server.

| Compounds                                                                                                                                                                                                                       | ZINC ID                                         | Physiochemical properties |                        |     |       |     |     | Water Solubility | Lipophilicity | Drug likeness |       |        |
|---------------------------------------------------------------------------------------------------------------------------------------------------------------------------------------------------------------------------------|-------------------------------------------------|---------------------------|------------------------|-----|-------|-----|-----|------------------|---------------|---------------|-------|--------|
|                                                                                                                                                                                                                                 |                                                 | MWT (g/mol)               | TPSA (Å <sup>2</sup> ) | NRB | MR    | HBA | HBD | Class            | Log Po/w      | Lipinski      | Veber | Muegge |
| CP1                                                                                                                                                                                                                             | <chem>Fc1cnc(c(n1)C(=O)N)O</chem>               | 157.1                     | 89.1                   | 1   | 32.11 | 5   | 2   | Very soluble     | 0.7           | 0             | 0     | 1      |
| CP2                                                                                                                                                                                                                             | <chem>Nn1c(=S)[nH]nc1c1ccncc1</chem>            | 193.23                    | 104.61                 | 1   | 50.79 | 2   | 2   | Very soluble     | 0.88          | 0             | 0     | 1      |
| CP3                                                                                                                                                                                                                             | <chem>OC(=O)CCc1ccc(cc1)O</chem>                | 166.17                    | 57.53                  | 3   | 44.82 | 3   | 2   | Very soluble     | 1.19          | 0             | 0     | 1      |
| CP4                                                                                                                                                                                                                             | <chem>Nn1c(=S)[nH]nc1c1ccncc1</chem>            | 193.23                    | 104.61                 | 1   | 50.79 | 2   | 2   | Very soluble     | 0.97          | 0             | 0     | 1      |
| CP5                                                                                                                                                                                                                             | <chem>Sc1nnc(o1)c1cc2c([nH]1)ccccc2</chem>      | 217.25                    | 93.51                  | 1   | 58.84 | 3   | 1   | Soluble          | 2.11          | 0             | 0     | 0      |
| CP6                                                                                                                                                                                                                             | <chem>Clc1ccc(c(c1)F)c1nnc(o1)S</chem>          | 230.65                    | 77.72                  | 1   | 51.95 | 4   | 0   | Soluble          | 2.32          | 0             | 0     | 0      |
| CP7                                                                                                                                                                                                                             | <chem>Sc1nnc(o1)Cc1ccccc1F</chem>               | 210.23                    | 77.72                  | 2   | 50.96 | 4   | 0   | Soluble          | 2.2           | 0             | 0     | 0      |
| CP8                                                                                                                                                                                                                             | <chem>NC(=S)N/N=C/c1ccc(cc1)[N+](=O)[O-]</chem> | 224.24                    | 128.32                 | 4   | 62.02 | 3   | 2   | Soluble          | 1.36          | 0             | 0     | 0      |
| CP9                                                                                                                                                                                                                             | <chem>CCNC(=S)N/N=C(/c1cc(sc1C)C)\C</chem>      | 255.4                     | 96.75                  | 5   | 75.52 | 1   | 2   | Soluble          | 3.1           | 0             | 0     | 0      |
| MWT = Molecular Weight, TPSA = Topological Polar Surface Area, NRB = Number of Rotatable bond, MR = Molar Refractivity, HBA = Hydrogen bond acceptor, HBD = Hydrogen bond donor, Log Po/w = Partition Coefficient octanol/water |                                                 |                           |                        |     |       |     |     |                  |               |               |       |        |

MWT = Molecular weight , TPSA = topological polar surface area, NRB = Number of rotatable bonds, MR = Molar refractivity, HBA = Hydrogen bond acceptor, HBD = hydrogen bond donor, Log Po/w = Partition coefficient octanol/water.

**Table S2.** Pharmacokinetics properties of compounds **1-9** calculated by SwissADME server.

| Compo<br>unds | SMILE                                          |  | Pharmacokinetics |          |               |                             |                                  |                             |                             |                             | Log<br>Kp |
|---------------|------------------------------------------------|--|------------------|----------|---------------|-----------------------------|----------------------------------|-----------------------------|-----------------------------|-----------------------------|-----------|
|               |                                                |  | GIA              | BBB<br>P | P-<br>gp<br>S | CYP<br>1A2<br>inhi<br>bitor | CYP<br>2C1<br>9<br>inhi<br>bitor | CYP<br>2C9<br>inhi<br>bitor | CYP<br>2D6<br>inhi<br>bitor | CYP<br>3A4<br>inhi<br>bitor |           |
| CP1           | <chem>Fc1cnc(c(n1)C(=O)N)O</chem>              |  | High             | No       | No            | No                          | No                               | No                          | No                          | No                          | -7.29     |
| CP2           | <chem>Nn1c(=S)[nH]nc1c1ccncc1</chem>           |  | High             | No       | No            | No                          | No                               | No                          | No                          | No                          | -7.61     |
| CP3           | <chem>OC(=O)CCc1ccc(cc1)O</chem>               |  | High             | Yes      | No            | No                          | No                               | No                          | No                          | No                          | -6.49     |
| CP4           | <chem>Nn1c(=S)[nH]nc1c1cccnc1</chem>           |  | High             | No       | No            | No                          | No                               | No                          | No                          | No                          | -7.61     |
| CP5           | <chem>Sc1nnc(o1)c1cc2c([nH]1)cccc2</chem>      |  | High             | No       | No            | Yes                         | No                               | No                          | No                          | Yes                         | -6.16     |
| CP6           | <chem>Clc1ccc(c(c1)F)c1nnc(o1)S</chem>         |  | High             | Yes      | No            | Yes                         | No                               | No                          | No                          | No                          | -5.85     |
| CP7           | <chem>Sc1nnc(o1)Cc1cccc1F</chem>               |  | High             | Yes      | No            | Yes                         | No                               | No                          | No                          | No                          | -5.96     |
| CP8           | <chem>NC(=S)N/N=C/c1ccc(c1)[N+](=O)[O-]</chem> |  | High             | No       | No            | Yes                         | No                               | No                          | No                          | No                          | -6.69     |
| CP9           | <chem>CCNC(=S)N/N=C(/c1cc(sc1C)C)C</chem>      |  | High             | No       | No            | Yes                         | Yes                              | Yes                         | No                          | No                          | -5.96     |

GIA = gastrointestinal absorption, BBBP = Blood brain barrier permeability, P-gp S = P-glycoprotein substrate, Log Kp = skin permeation.

**Table S3.** Drug likeness and medicinal chemistry properties of compounds **1-9** estimated by SwissADME server.

| Compounds | SMILE                                           | Drug likeness          | Medicinal chemistry |               |                         |
|-----------|-------------------------------------------------|------------------------|---------------------|---------------|-------------------------|
|           |                                                 | Bio Availability Score | PAINS Alert         | Lead likeness | Synthetic accessibility |
| CP1       | <chem>Fc1cnc(c(n1)C(=O)N)O</chem>               | 0.55                   | 0                   | 1             | 2.03                    |
| CP2       | <chem>Nn1c(=S)[nH]nc1c1ccncc1</chem>            | 0.55                   | 0                   | 1             | 2.21                    |
| CP3       | <chem>OC(=O)CCc1ccc(cc1)O</chem>                | 0.85                   | 0                   | 1             | 1                       |
| CP4       | <chem>Nn1c(=S)[nH]nc1c1ccncc1</chem>            | 0.55                   | 0                   | 1             | 2.34                    |
| CP5       | <chem>Sc1nnc(o1)c1cc2c([nH]1)cccc2</chem>       | 0.55                   | 0                   | 1             | 2.13                    |
| CP6       | <chem>C1c1ccc(c(c1)F)c1nnc(o1)S</chem>          | 0.55                   | 0                   | 1             | 2.12                    |
| CP7       | <chem>Sc1nnc(o1)Cc1cccc1F</chem>                | 0.55                   | 0                   | 1             | 2.02                    |
| CP8       | <chem>NC(=S)N/N=C/c1ccc(cc1)[N+](=O)[O-]</chem> | 0.55                   | 0                   | 1             | 2.28                    |
| CP9       | <chem>CCNC(=S)N/N=C(/c1cc(sc1C)C)\C</chem>      | 0.55                   | 0                   | 0             | 3.09                    |

**Table S4.** Hydrogen bond interactions of Isla with the selected ligands and reference (7KQ3) versus simulation time.

| Compound | H-Acceptor | H-Donor    | Bond life (%) | Avg-Distance (Å) | Avg-Angle° |
|----------|------------|------------|---------------|------------------|------------|
| 7KQ3     | GLU470-OE2 | 8X3831-O6  | 52.43%        | 2.71             | 163.76     |
|          | 8X3831-O4  | ARG678-NH1 | 42.34%        | 2.81             | 160.92     |
|          | 8X3831-O5  | ARG189-NH2 | 40.67%        | 2.82             | 153.83     |
|          | 8X3831-O7  | TYR485-OH  | 36.45%        | 2.73             | 161.65     |
|          | 8X3831-O5  | ARG189-NH1 | 34.26%        | 2.81             | 153.67     |
|          | 8X3831-O7  | ARG189-NH1 | 28.00%        | 2.81             | 156.12     |
|          | 8X3831-O5  | ARG678-NH1 | 24.50%        | 2.81             | 159.18     |
|          | 8X3831-O5  | TYR485-OH  | 23.98%        | 2.74             | 161.77     |
|          | 8X3831-O4  | TYR485-OH  | 22.53%        | 2.74             | 161.51     |
|          | 8X3831-O4  | ARG189-NH1 | 22.47%        | 2.78             | 155.23     |
|          | 8X3831-O4  | TYR587-OH  | 22.26%        | 2.71             | 161.09     |
|          | 8X3831-O7  | TYR587-OH  | 22.08%        | 2.69             | 161.89     |
|          | 8X3831-O5  | TYR587-OH  | 21.79%        | 2.71             | 160.30     |
|          | 8X3831-O7  | ARG189-NH2 | 20.22%        | 2.83             | 152.06     |
|          | 8X3831-O7  | ARG678-NH1 | 20.16%        | 2.81             | 160.04     |
|          | 8X3831-O7  | ARG678-NH2 | 19.09%        | 2.86             | 160.81     |
|          | 8X3831-O4  | ARG189-NH2 | 19.05%        | 2.83             | 150.74     |
|          | 8X3831-O6  | GLN193-NE2 | 16.70%        | 2.90             | 159.33     |
|          | 8X3831-O6  | CYS468-N   | 15.89%        | 2.88             | 158.70     |
|          | 8X3831-O4  | ARG678-NH2 | 8.40%         | 2.86             | 157.03     |
|          | 8X3831-O5  | ARG678-NH2 | 6.80%         | 2.85             | 153.83     |
|          | 8X3831-O7  | THR312-OG1 | 6.44%         | 2.77             | 157.18     |
|          | THR312-OG1 | 8X3831-O6  | 6.24%         | 2.84             | 159.78     |
|          | GLU470-OE1 | 8X3831-O6  | 1.24%         | 2.79             | 162.82     |
|          | 8X3831-O7  | GLN193-NE2 | 0.54%         | 2.85             | 166.16     |
|          | 8X3831-O6  | THR312-OG1 | 0.45%         | 2.83             | 164.88     |
|          | VAL680-O   | 8X3831-O6  | 0.17%         | 2.82             | 156.84     |
|          | 8X3831-O5  | THR312-OG1 | 0.09%         | 2.72             | 158.50     |
|          | TRP374-NE1 | 8X3831-O6  | 0.07%         | 2.93             | 146.89     |
|          | 8X3831-O6  | TYR587-OH  | 0.02%         | 2.88             | 152.78     |
|          | 8X3831-O5  | TRP374-NE1 | 0.01%         | 2.86             | 139.43     |
|          | 8X3831-O6  | GLN193-N   | 0.01%         | 2.91             | 140.64     |
|          | 8X3831-O6  | ARG678-NH1 | 0.01%         | 2.92             | 142.68     |
|          | 8X3831-O4  | GLY483-N   | 0.01%         | 2.93             | 163.93     |
|          | 8X3831-O7  | TRP374-NE1 | 0.01%         | 2.90             | 149.77     |
|          | 8X3831-O6  | TRP374-NE1 | 0.01%         | 2.96             | 144.22     |
| CPI      | CP1831-O7  | ARG189-NH1 | 60.24%        | 2.82             | 153.43     |
|          | THR312-OG1 | CP1831-N6  | 52.20%        | 2.87             | 158.11     |
|          | CP1831-O10 | TYR587-OH  | 44.53%        | 2.78             | 160.36     |
|          | CP1831-O7  | GLN193-NE2 | 34.99%        | 2.85             | 157.99     |
|          | CP1831-O10 | ARG189-NH2 | 32.87%        | 2.86             | 155.73     |
|          | GLU589-OE1 | CP1831-N9  | 22.41%        | 2.83             | 153.98     |
|          | GLU589-OE2 | CP1831-N9  | 22.03%        | 2.82             | 158.68     |
|          | CP1831-O10 | ARG189-NH1 | 13.54%        | 2.87             | 150.30     |
|          | GLY311-O   | CP1831-N6  | 5.58%         | 2.89             | 157.98     |
|          | TYR485-OH  | CP1831-N9  | 5.22%         | 2.90             | 144.39     |
|          | CP1831-O7  | GLN193-N   | 3.93%         | 2.92             | 153.09     |
|          | CP1831-F11 | PHE682-N   | 1.38%         | 2.89             | 140.97     |
|          | VAL680-O   | CP1831-N9  | 1.33%         | 2.85             | 143.80     |
|          | TYR485-OH  | CP1831-N9  | 0.55%         | 2.85             | 151.43     |
|          | CP1831-N9  | TYR485-OH  | 0.48%         | 2.89             | 144.91     |
|          | CP1831-O7  | ARG189-NH2 | 0.31%         | 2.91             | 145.44     |
|          | CP1831-O10 | ARG678-NH2 | 0.20%         | 2.88             | 148.13     |
|          | GLU589-OE2 | CP1831-N9  | 0.19%         | 2.87             | 145.00     |
|          | GLU589-OE1 | CP1831-N9  | 0.17%         | 2.84             | 145.44     |
|          | CP1831-N9  | ARG678-NH2 | 0.10%         | 2.90             | 141.91     |
|          | CP1831-N3  | ARG678-NH2 | 0.09%         | 2.89             | 141.50     |
|          | CP1831-O10 | GLN193-NE2 | 0.08%         | 2.93             | 139.33     |
|          | ARG678-NH2 | CP1831-N9  | 0.05%         | 2.90             | 137.91     |
|          | CP1831-N9  | ARG678-NH2 | 0.03%         | 2.96             | 139.20     |
| CP2      | TYR479-OH  | CP2831-N7  | 78.58%        | 2.80             | 152.16     |

|     |            |            |        |      |        |
|-----|------------|------------|--------|------|--------|
|     | ASN675-OD1 | CP2831-N13 | 75.73% | 2.72 | 145.32 |
|     | CP2831-O11 | ALA484-N   | 21.40% | 2.90 | 156.83 |
|     | CP2831-N14 | TYR587-N   | 0.14%  | 2.96 | 144.17 |
|     | GLN544-OE1 | CP2831-N13 | 0.13%  | 2.70 | 144.49 |
|     | TYR479-OH  | CP2831-N13 | 0.01%  | 2.82 | 139.66 |
|     | GLY482-O   | CP2831-N7  | 0.01%  | 2.83 | 138.53 |
| CP4 | TYR587-O   | CP4831-N14 | 61.47% | 2.85 | 159.09 |
|     | SER481-O   | CP4831-N11 | 15.32% | 2.91 | 152.38 |
|     | TYR479-OH  | CP4831-N11 | 4.11%  | 2.90 | 151.32 |
|     | GLN544-OE1 | CP4831-N14 | 3.00%  | 2.87 | 147.99 |
|     | CP4831-N11 | GLY483-N   | 2.10%  | 2.94 | 145.89 |
|     | CP4831-N3  | GLY483-N   | 1.06%  | 2.95 | 155.68 |
|     | CP4831-N14 | TYR587-N   | 0.34%  | 2.96 | 145.76 |
|     | CP4831-N3  | THR185-OG1 | 0.01%  | 2.97 | 162.45 |
| CP5 | GLU589-OE1 | CP5831-N4  | 96.38% | 2.75 | 162.09 |
|     | GLU589-OE1 | CP5831-N7  | 37.20% | 2.87 | 147.74 |
|     | CP5831-O15 | ARG189-NH1 | 16.20% | 2.88 | 152.27 |
|     | CP5831-O14 | ARG189-NH1 | 14.16% | 2.88 | 152.54 |
|     | CP5831-N3  | TYR485-OH  | 14.11% | 2.87 | 162.63 |
|     | TYR587-O   | CP5831-N7  | 5.47%  | 2.88 | 151.08 |
|     | ALA484-O   | CP5831-N7  | 4.24%  | 2.89 | 143.61 |
|     | CP5831-N4  | TYR485-OH  | 1.01%  | 2.93 | 145.22 |
|     | CP5831-O15 | ARG678-NH2 | 0.95%  | 2.90 | 147.57 |
|     | CP5831-O14 | ARG678-NH2 | 0.88%  | 2.91 | 149.07 |
|     | CP5831-N3  | TYR587-OH  | 0.86%  | 2.89 | 157.04 |
|     | GLY483-O   | CP5831-N7  | 0.61%  | 2.91 | 160.82 |
|     | CP5831-N3  | ARG189-NH2 | 0.58%  | 2.93 | 156.35 |
|     | CP5831-O14 | ARG678-NH1 | 0.40%  | 2.90 | 146.48 |
|     | CP5831-O15 | ARG678-NH1 | 0.35%  | 2.90 | 148.07 |
|     | CP5831-O14 | ARG189-NH2 | 0.31%  | 2.91 | 145.85 |
|     | CP5831-O15 | ARG189-NH2 | 0.28%  | 2.91 | 145.24 |
|     | CP5831-O15 | CYS468-N   | 0.24%  | 2.90 | 147.41 |
|     | CP5831-O15 | TRP374-NE1 | 0.15%  | 2.90 | 143.00 |
|     | CP5831-O14 | TRP374-NE1 | 0.14%  | 2.91 | 141.38 |
|     | CP5831-N13 | ARG189-NH1 | 0.13%  | 2.96 | 148.60 |
|     | CP5831-O15 | TYR485-OH  | 0.07%  | 2.85 | 147.35 |
|     | CP5831-O14 | TYR485-OH  | 0.04%  | 2.89 | 143.26 |
|     | CP5831-O14 | ARG189-NH1 | 0.02%  | 2.85 | 143.57 |
|     | ALA484-O   | CP5831-N7  | 0.02%  | 2.88 | 151.60 |
|     | CP5831-O15 | THR312-OG1 | 0.01%  | 2.76 | 140.87 |
|     | CP5831-O15 | ARG189-NH1 | 0.01%  | 2.84 | 144.17 |
|     | CP5831-O14 | THR312-OG1 | 0.01%  | 2.95 | 148.11 |
| CP8 | GLU589-OE1 | CP8831-N12 | 63.64% | 2.80 | 162.38 |
|     | GLY483-O   | CP8831-N10 | 39.57% | 2.79 | 150.80 |
|     | CP8831-N2  | GLN193-NE2 | 24.07% | 2.92 | 166.19 |
|     | GLU589-OE1 | CP8831-N12 | 23.22% | 2.82 | 158.58 |
|     | TYR587-O   | CP8831-N12 | 10.00% | 2.90 | 158.15 |
|     | CP8831-N11 | ARG189-NH2 | 9.99%  | 2.92 | 151.07 |
|     | CP8831-N11 | THR185-OG1 | 2.36%  | 2.88 | 150.28 |
|     | TYR587-O   | CP8831-N12 | 1.91%  | 2.91 | 158.33 |
|     | THR185-OG1 | CP8831-N10 | 0.53%  | 2.84 | 148.48 |
|     | CP8831-N2  | GLN193-N   | 0.52%  | 2.96 | 154.19 |
|     | CP8831-N11 | ARG189-NE  | 0.15%  | 2.94 | 149.16 |
|     | TYR479-OH  | CP8831-N12 | 0.11%  | 2.93 | 153.40 |
|     | TYR485-OH  | CP8831-N12 | 0.09%  | 2.90 | 155.88 |
|     | GLU470-OE2 | CP8831-N12 | 0.07%  | 2.85 | 148.78 |
|     | GLU470-OE2 | CP8831-N12 | 0.06%  | 2.83 | 151.69 |
|     | CP8831-N11 | TYR485-OH  | 0.06%  | 2.94 | 152.14 |
|     | TYR485-OH  | CP8831-N10 | 0.01%  | 2.96 | 148.40 |
|     | TYR479-OH  | CP8831-N12 | 0.01%  | 2.93 | 141.07 |
| CP9 | CP9831-N11 | THR185-OG1 | 60.24% | 2.80 | 162.23 |
|     | GLY483-O   | CP9831-N10 | 59.63% | 2.82 | 160.41 |
|     | GLN193-OE1 | CP9831-N12 | 18.96% | 2.85 | 152.76 |
|     | SER481-O   | CP9831-N12 | 17.22% | 2.85 | 163.24 |
|     | GLU470-OE2 | CP9831-N12 | 12.60% | 2.85 | 150.52 |
|     | CP9831-N3  | ARG189-NH2 | 12.57% | 2.90 | 150.03 |

|  |            |            |        |      |        |
|--|------------|------------|--------|------|--------|
|  | GLN193-OE1 | CP9831-N12 | 12.14% | 2.85 | 152.90 |
|  | GLU470-OE2 | CP9831-N12 | 9.02%  | 2.84 | 152.17 |
|  | ALA484-O   | CP9831-N10 | 5.47%  | 2.88 | 148.73 |
|  | TYR587-O   | CP9831-N10 | 4.03%  | 2.80 | 141.43 |
|  | SER481-O   | CP9831-N12 | 2.13%  | 2.87 | 163.31 |
|  | CP9831-N12 | GLN193-NE2 | 1.07%  | 2.92 | 147.04 |
|  | CP9831-N10 | THR185-OG1 | 0.52%  | 2.95 | 144.10 |
|  | CP9831-N3  | ARG189-NE  | 0.45%  | 2.95 | 144.30 |
|  | CP9831-N3  | TYR485-OH  | 0.14%  | 2.84 | 159.58 |
|  | GLY483-N   | CP9831-N10 | 0.09%  | 2.95 | 140.27 |
|  | CP9831-N12 | ARG678-NH1 | 0.09%  | 2.94 | 149.87 |
|  | CP9831-N11 | TYR485-OH  | 0.08%  | 2.86 | 161.44 |
|  | TYR587-OH  | CP9831-N12 | 0.07%  | 2.94 | 152.90 |
|  | ARG678-NH2 | CP9831-N12 | 0.06%  | 2.93 | 153.20 |
|  | CP9831-N3  | ARG189-NH2 | 0.05%  | 2.88 | 145.30 |
|  | TYR485-OH  | CP9831-N12 | 0.05%  | 2.95 | 155.91 |
|  | ARG678-NH1 | CP9831-N12 | 0.04%  | 2.89 | 148.34 |
|  | CP9831-N3  | ARG189-NH1 | 0.04%  | 2.90 | 152.50 |
|  | CP9831-N11 | GLN193-NE2 | 0.04%  | 2.90 | 165.08 |
|  | GLY483-O   | CP9831-N12 | 0.04%  | 2.92 | 160.74 |
|  | TYR485-OH  | CP9831-N12 | 0.04%  | 2.95 | 152.67 |
|  | ARG678-NH1 | CP9831-N12 | 0.04%  | 2.95 | 153.42 |
|  | GLN544-OE1 | CP9831-N10 | 0.03%  | 2.91 | 148.93 |
|  | ARG678-NH2 | CP9831-N12 | 0.02%  | 2.97 | 146.71 |
|  | TYR479-OH  | CP9831-N12 | 0.01%  | 2.95 | 154.22 |
|  | GLN193-NE2 | CP9831-N12 | 0.01%  | 2.94 | 150.60 |

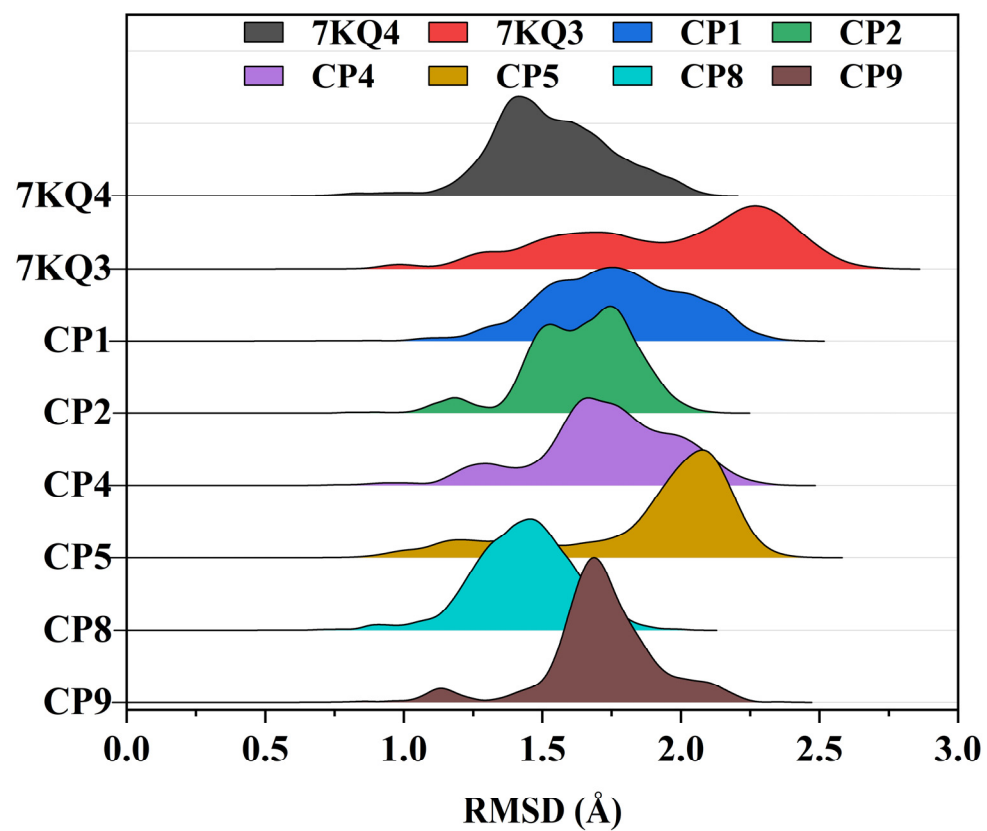

**Figure S1** Root mean square histogram analysis of Isla in free state (7KQ4), reference substrate attached (7KQ3) and in complex with selected putative inhibitors.



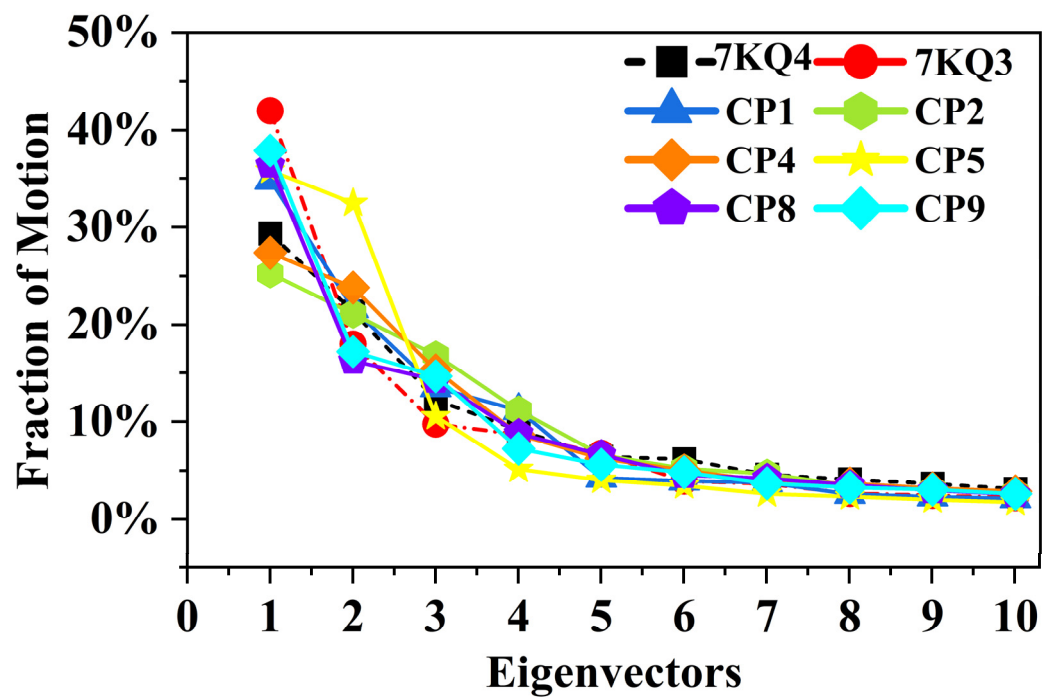

**Figure S2.** The covariance matrix plotted against the corresponding eigenvector from each system to obtain the first ten eigenvectors in fraction. The eigenvectors contribution for each system is reported in percentage.
